# Supplementary material for: The regulation of Hypoxia-Inducible Factor-1 (HIF-1alpha) expression by Protein Disulfide Isomerase (PDI)
Source: PubMed Central journal article supplement (PMC7861413; doi:10.1371/journal.pone.0246531), 2021-02-04

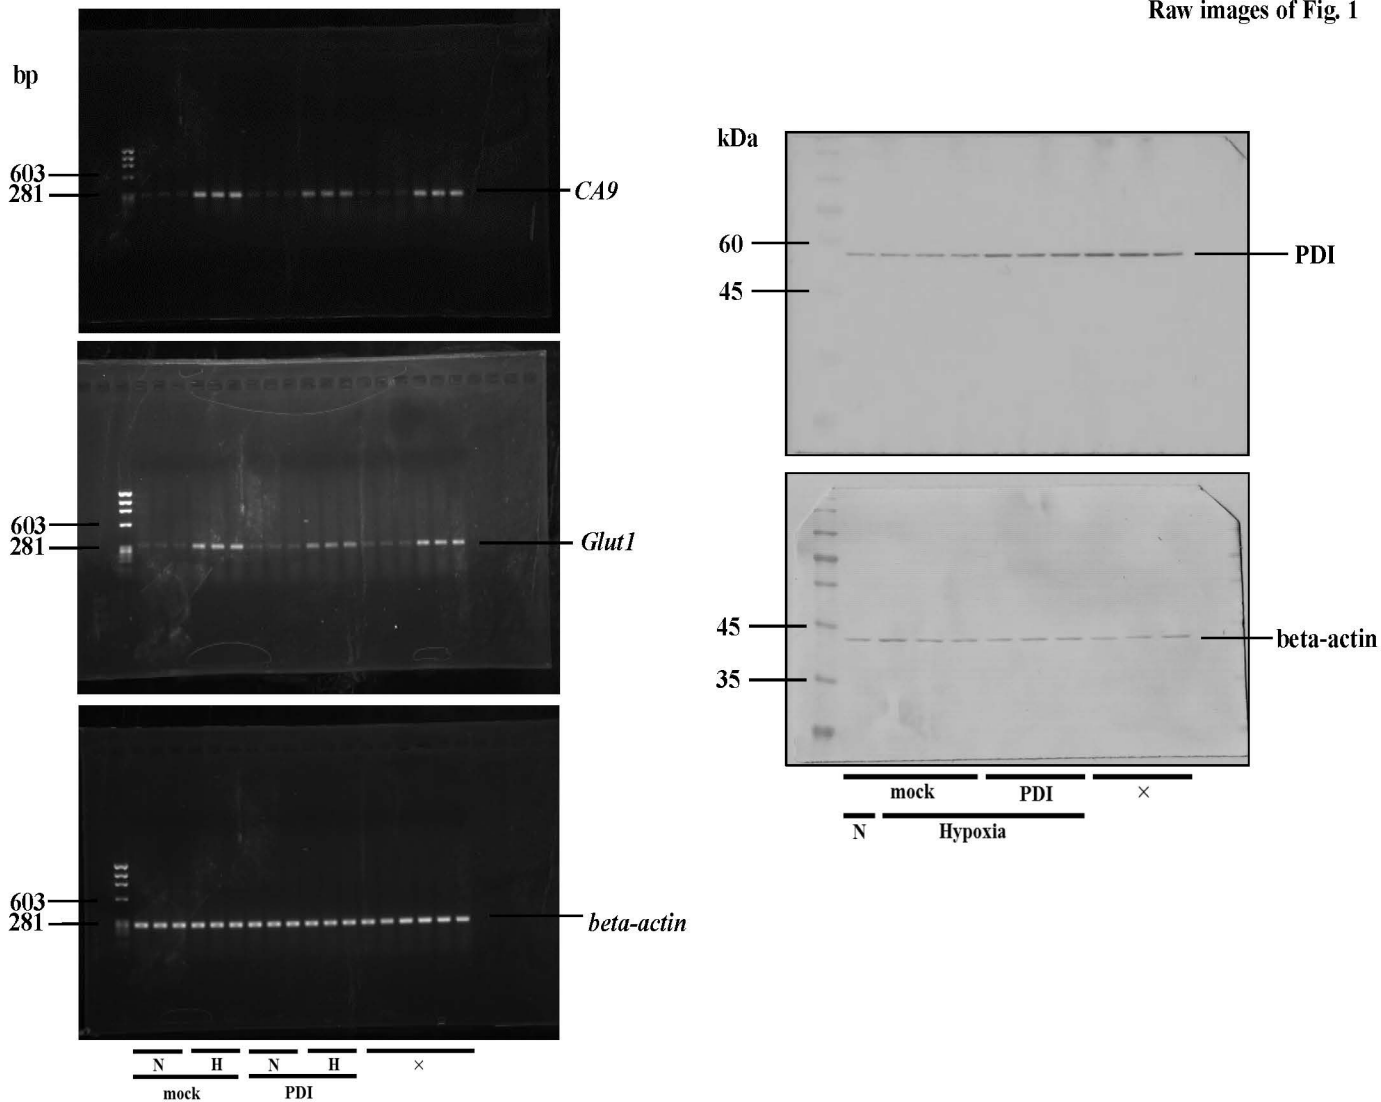

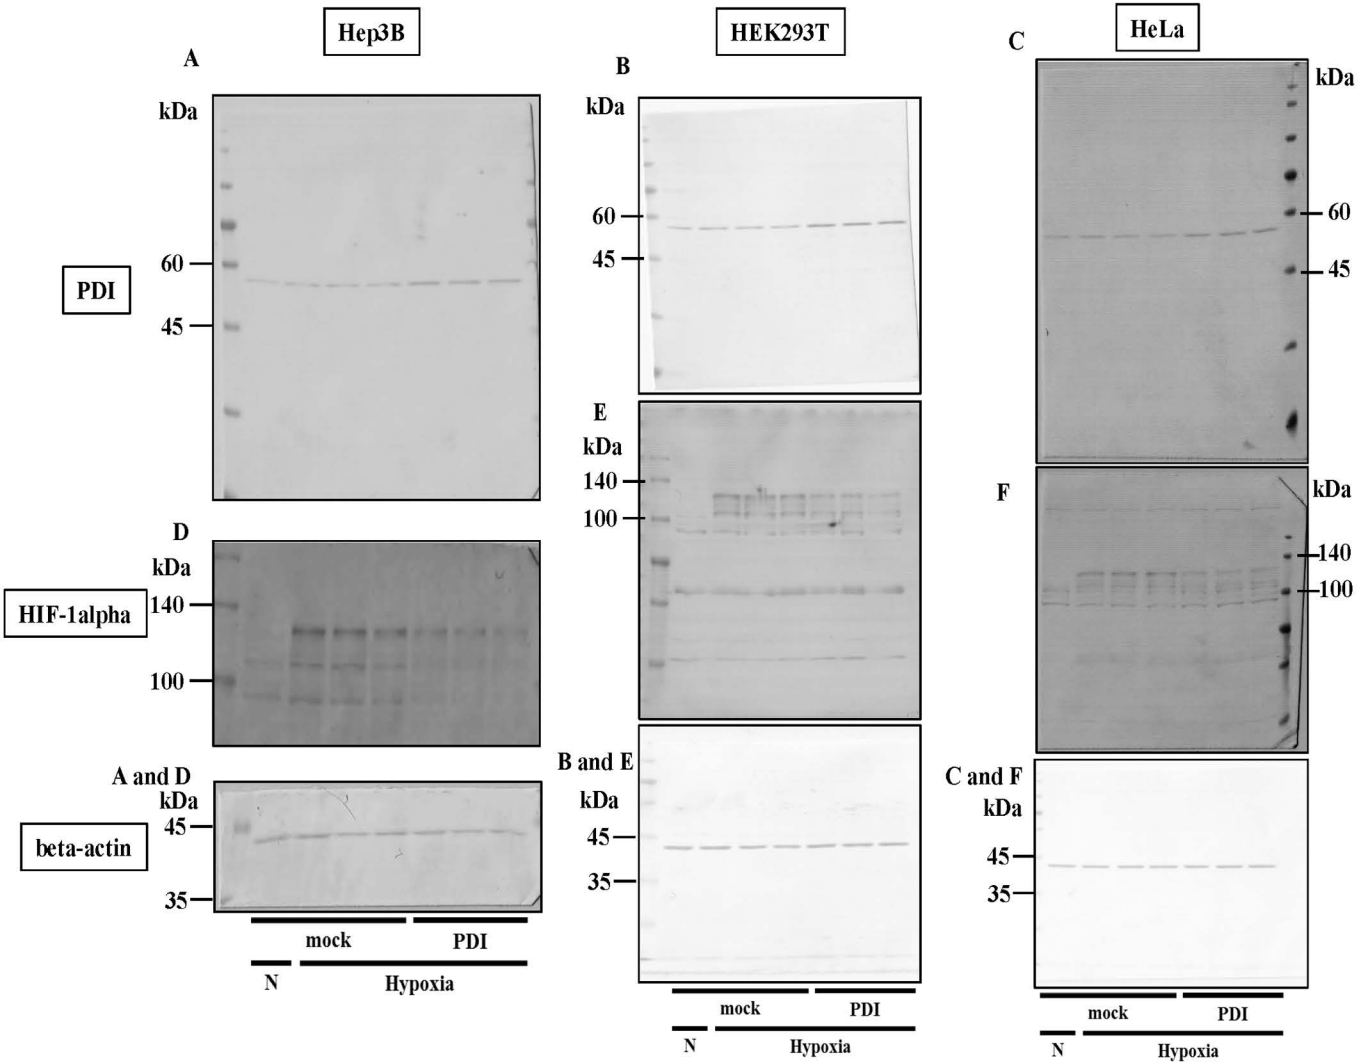

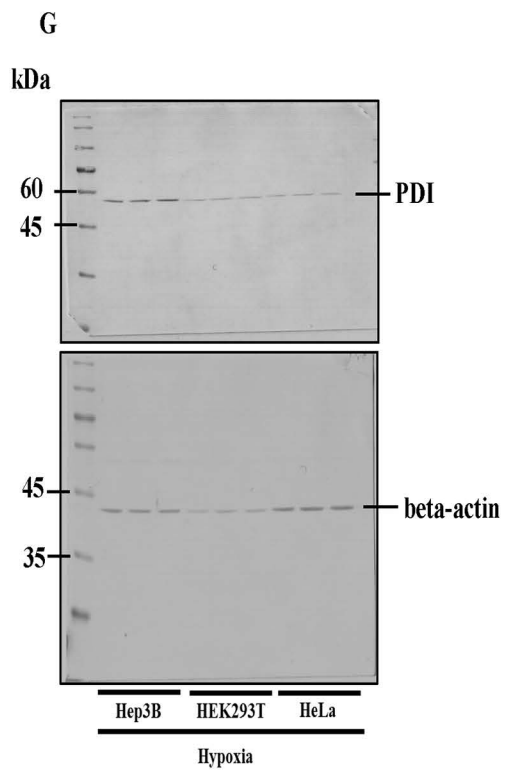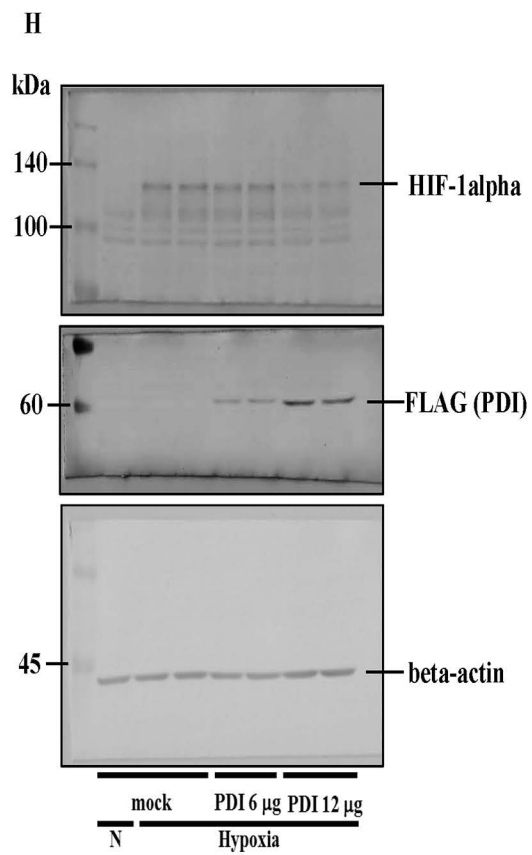

I

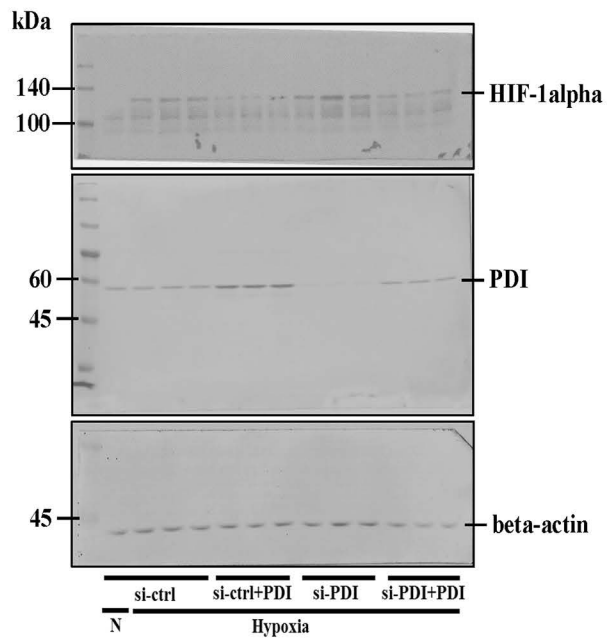

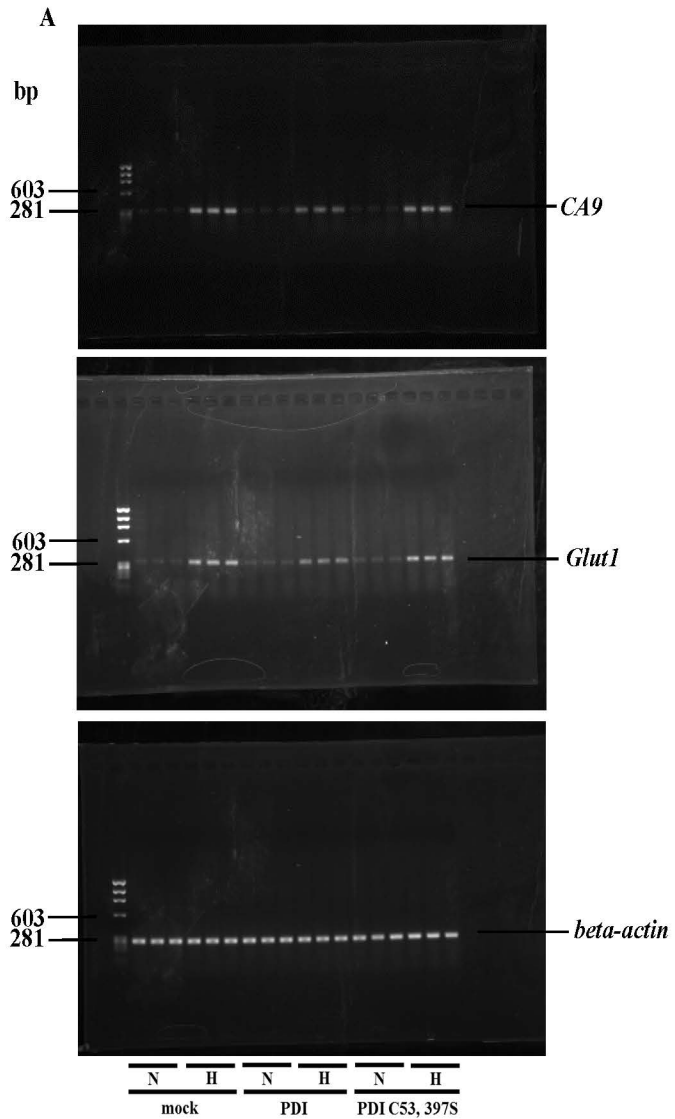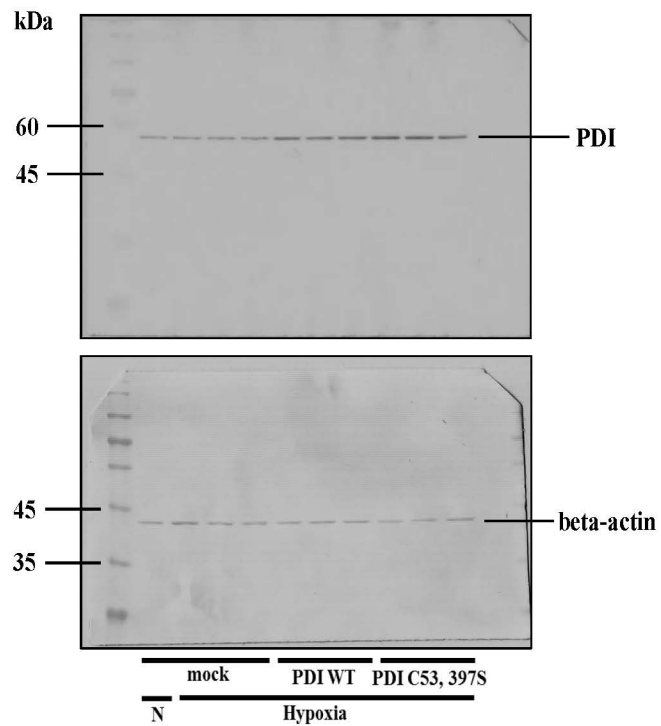

B

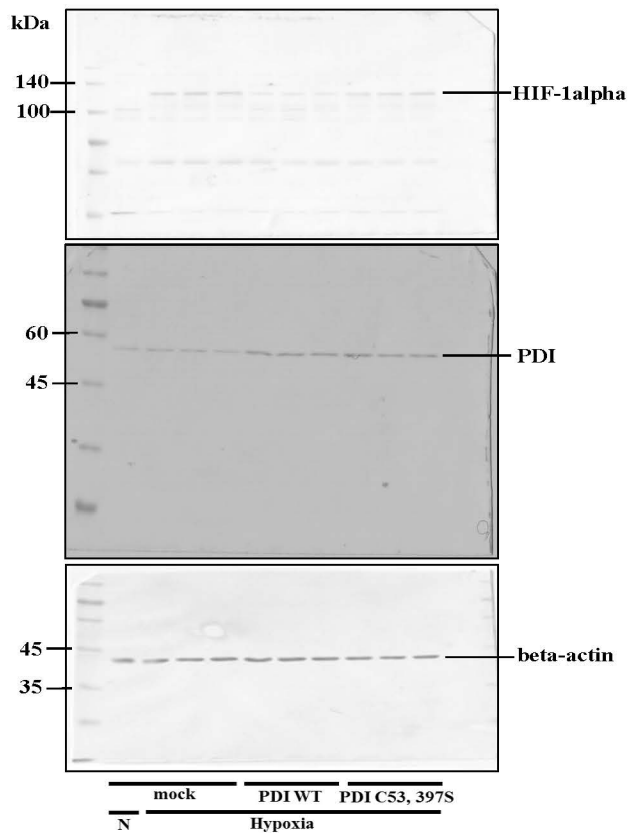

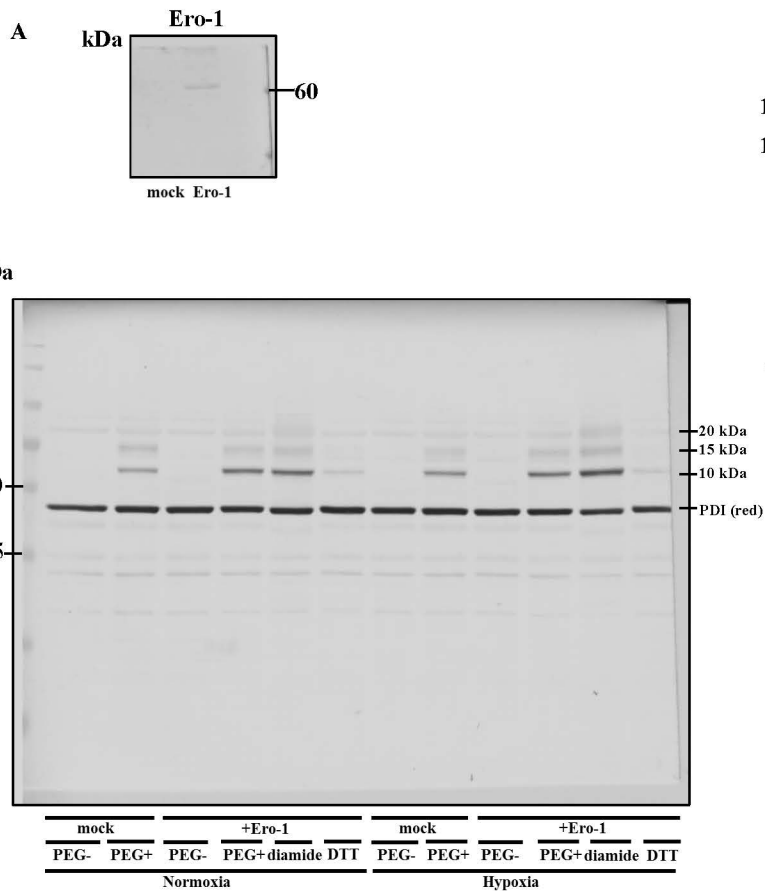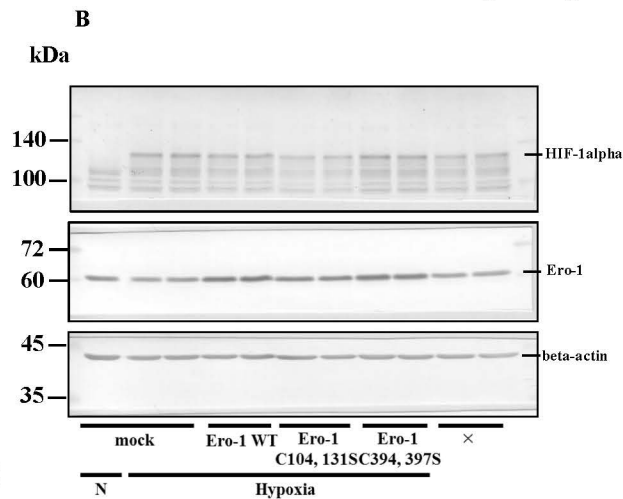

C

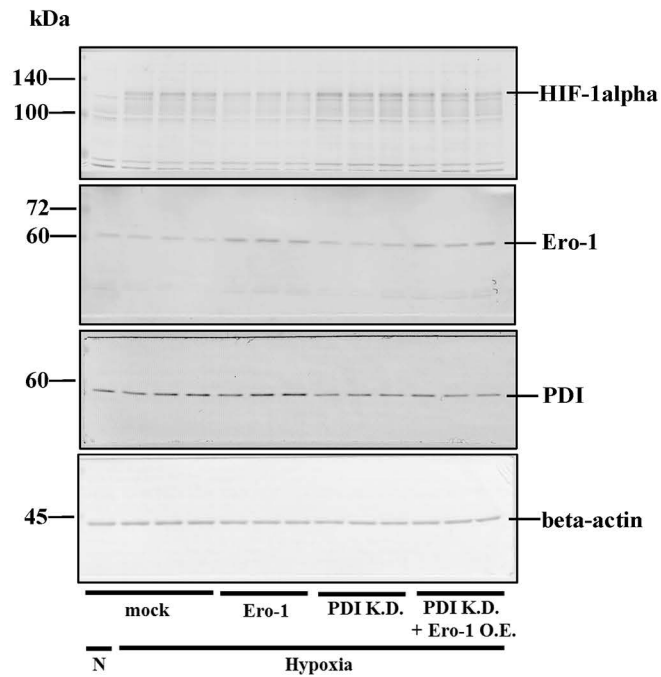



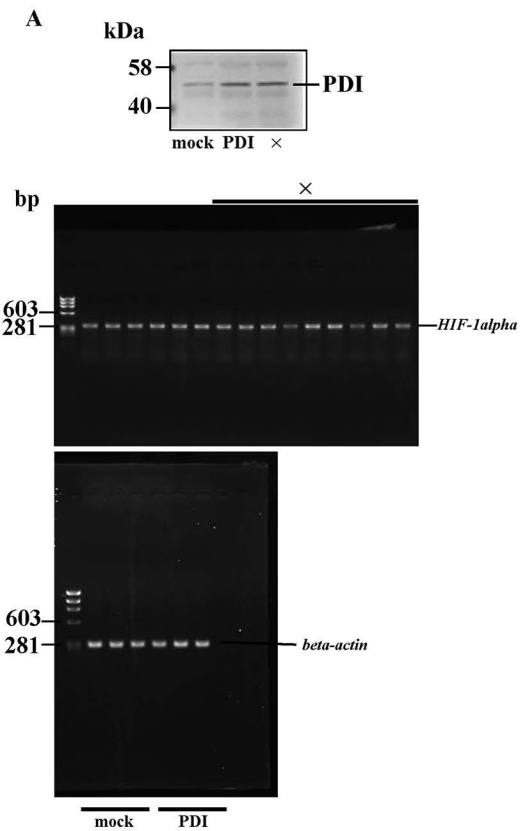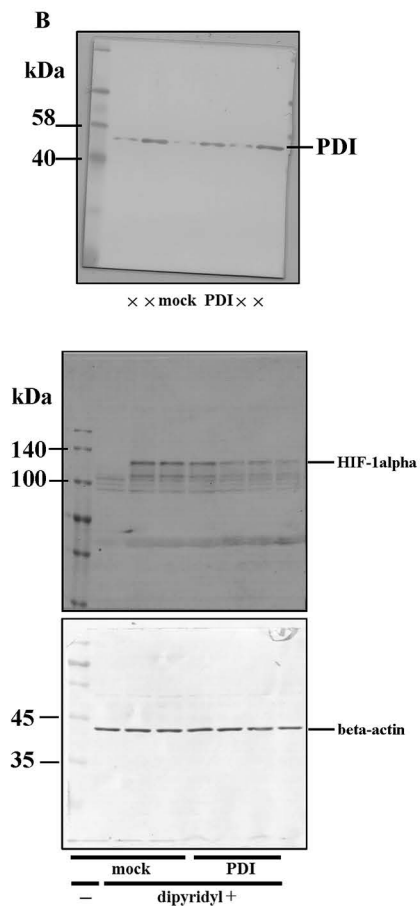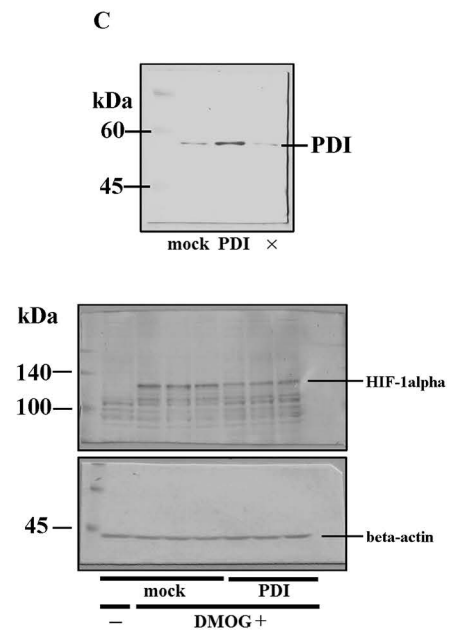

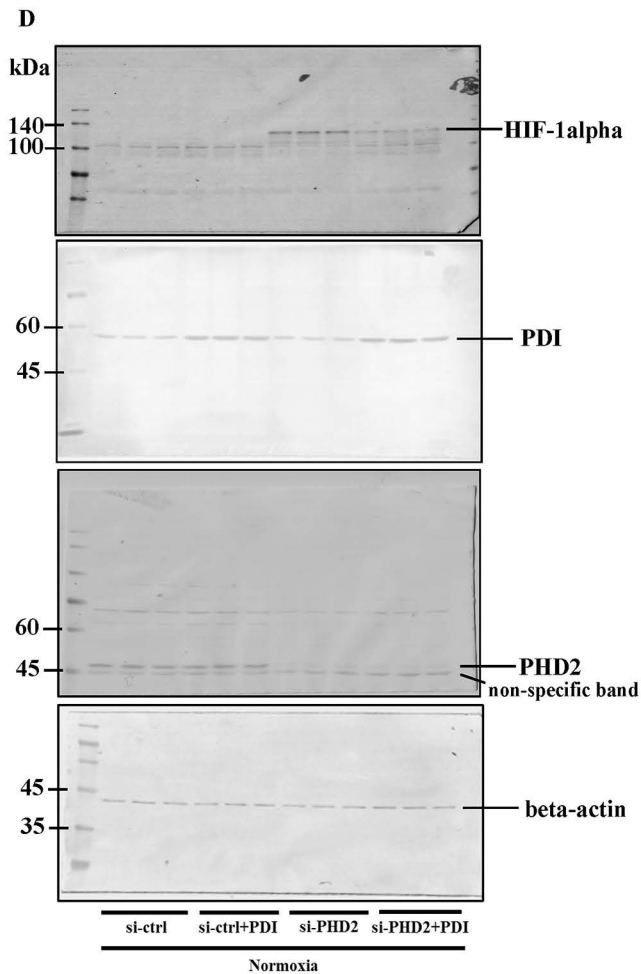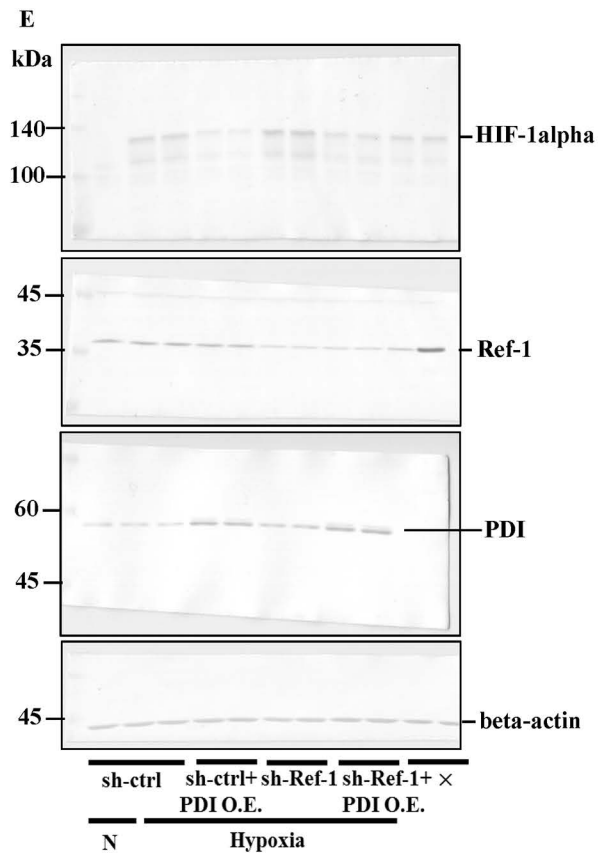

A

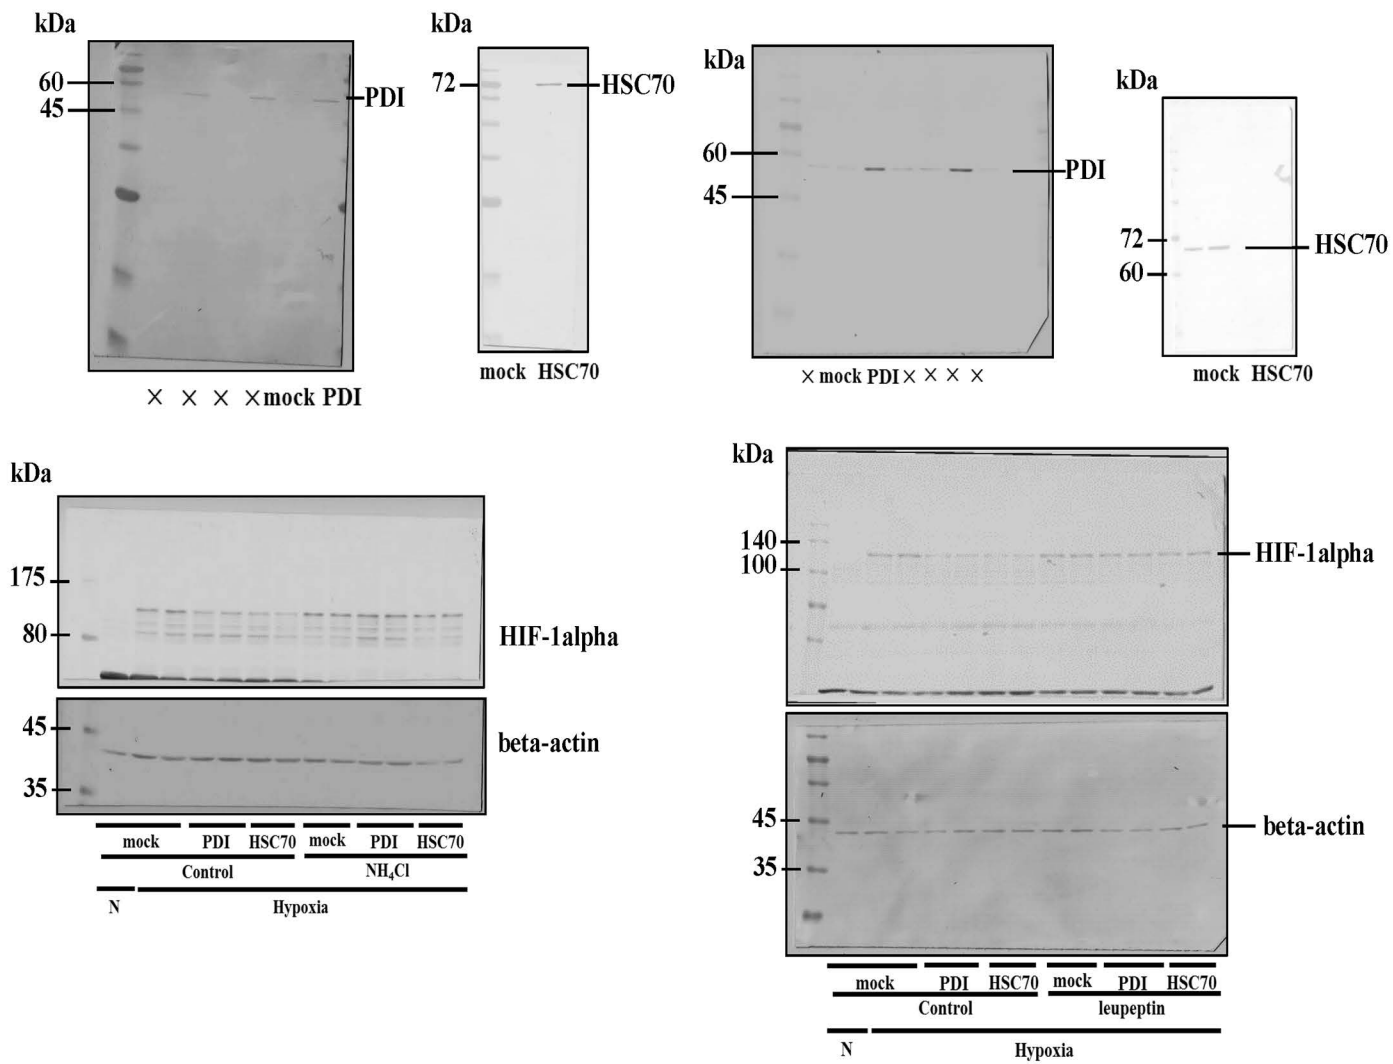

B

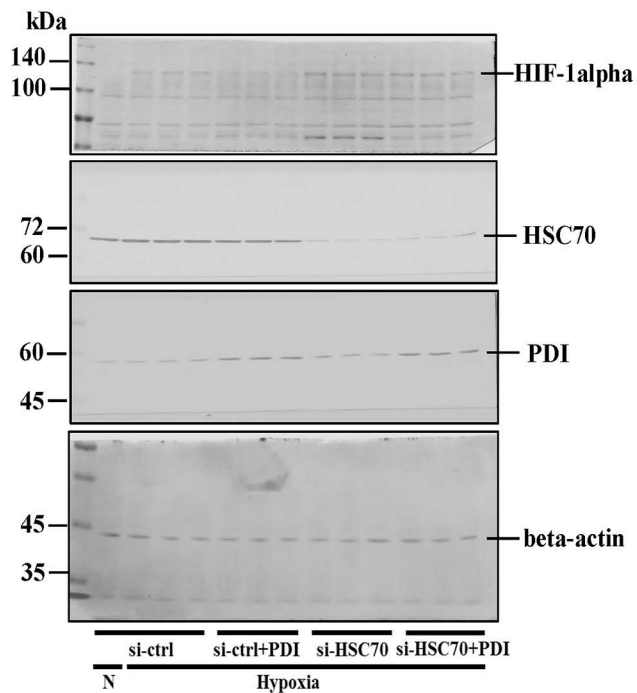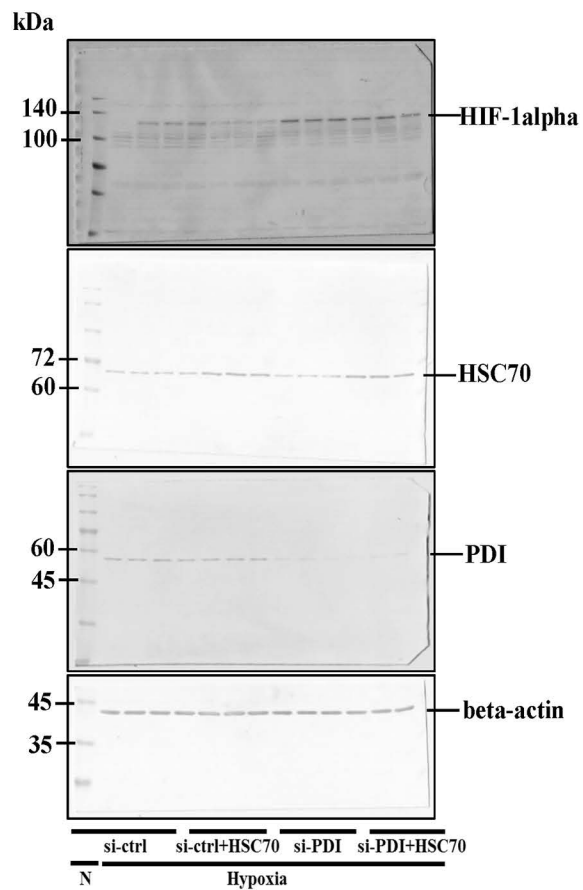

C

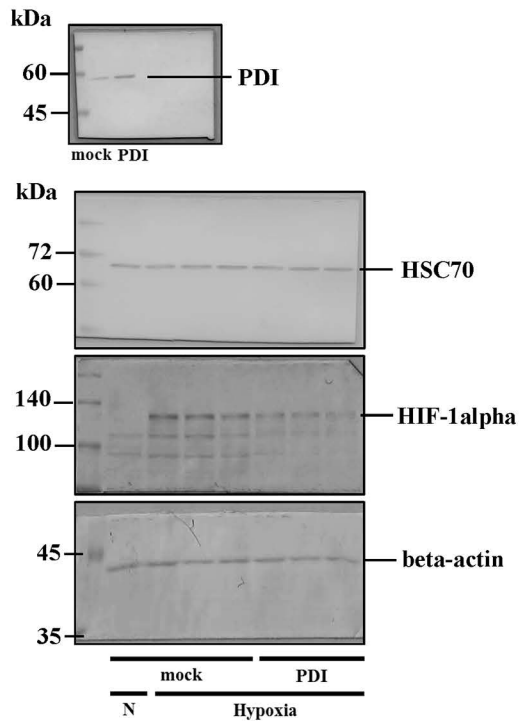

D

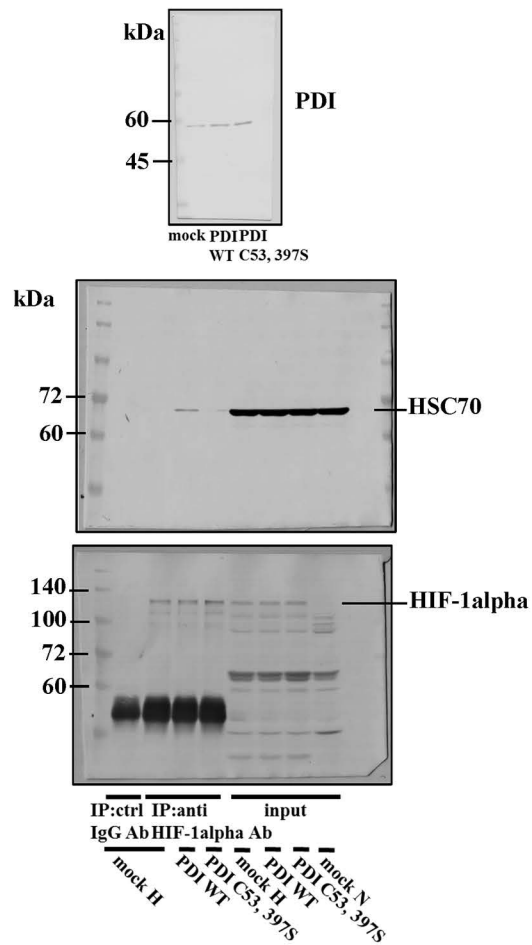

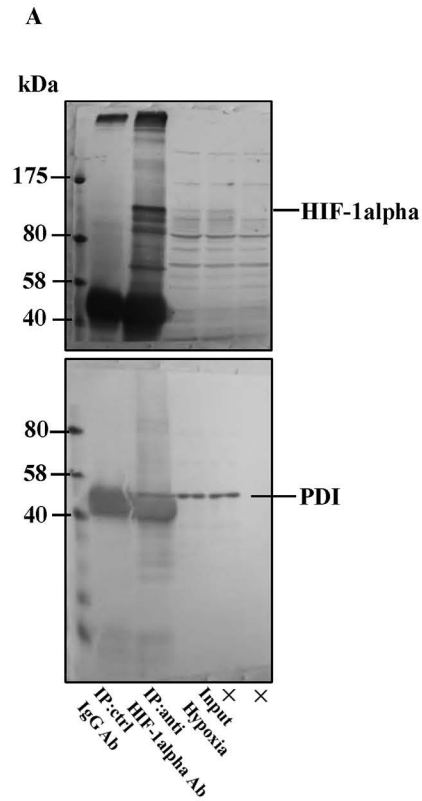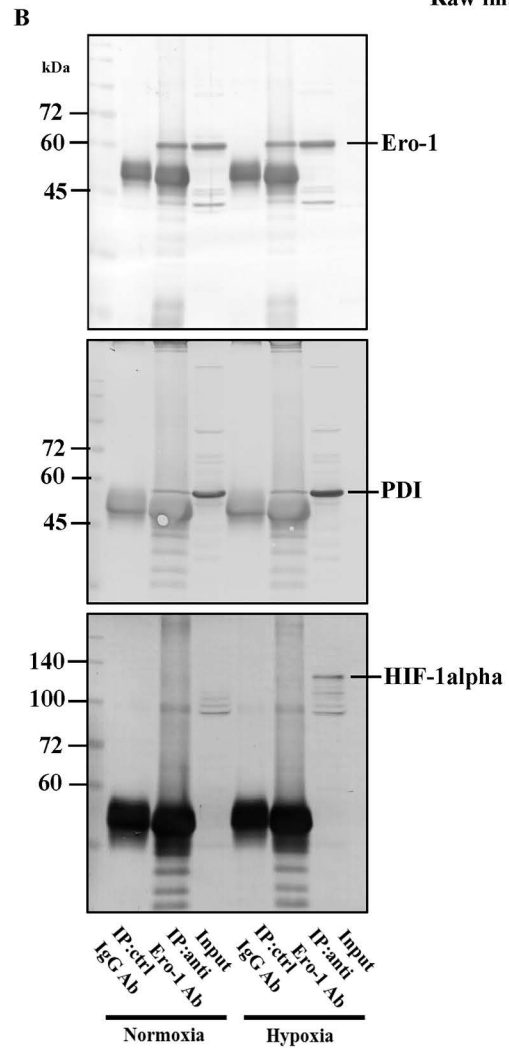

C

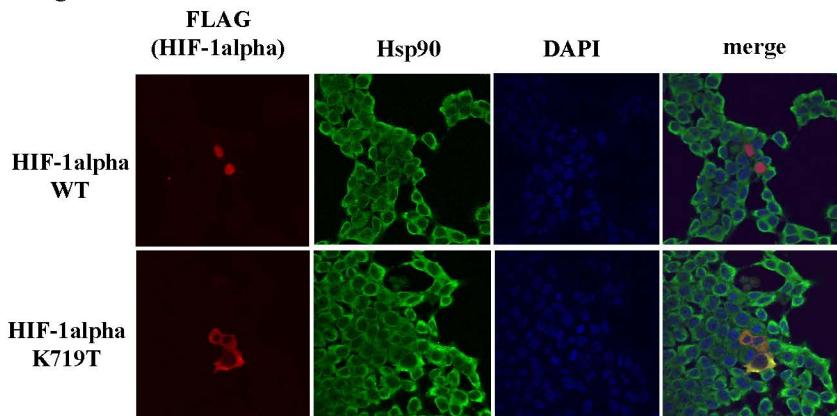

D

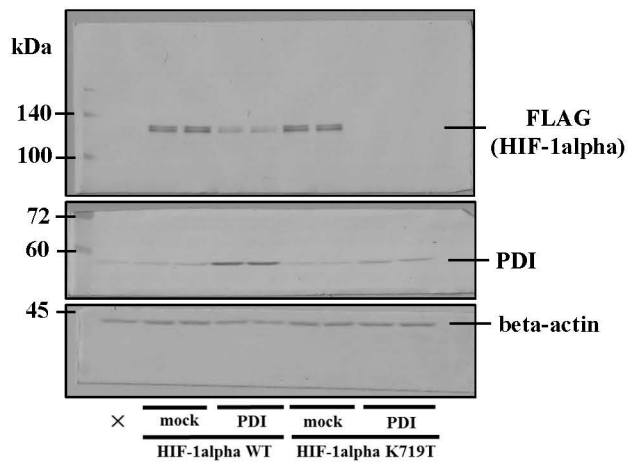

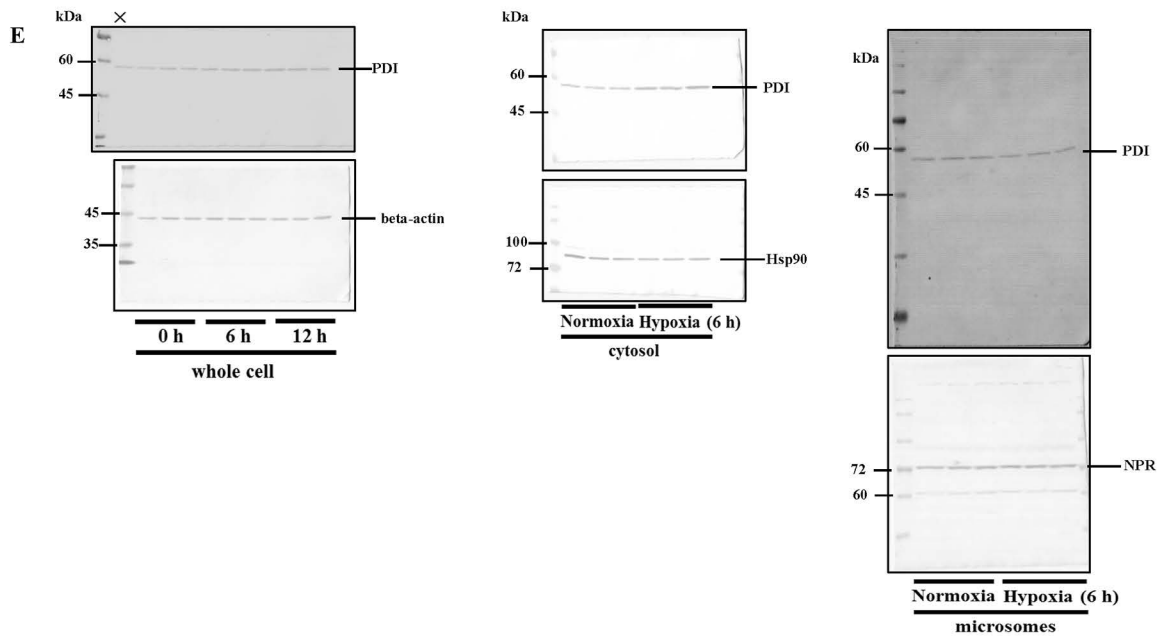



F

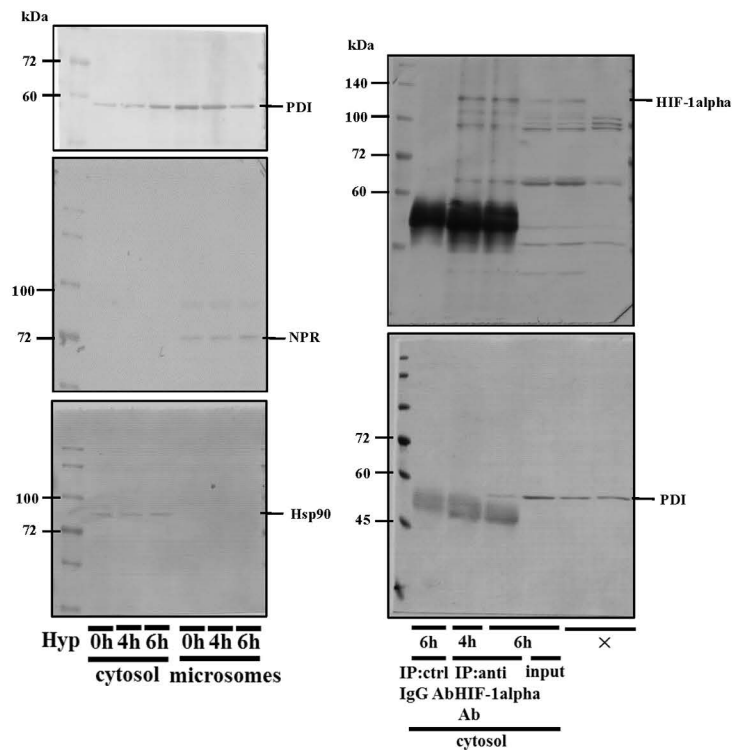

G

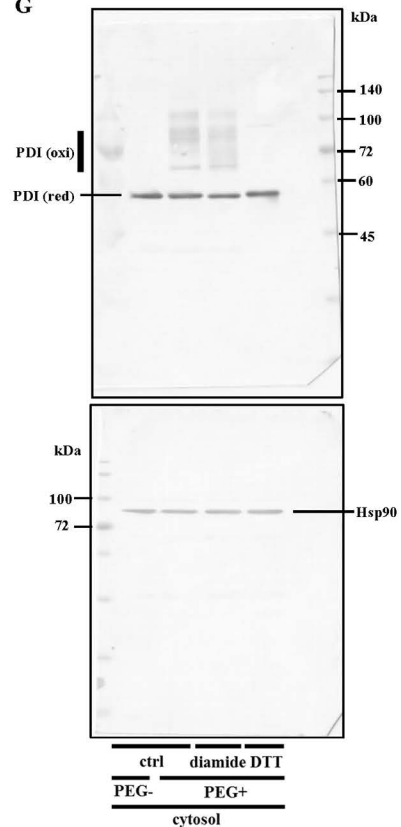

**H**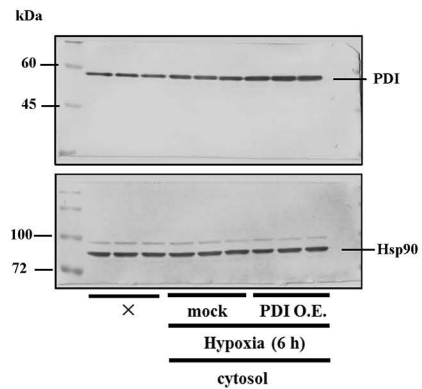

Fig. 8

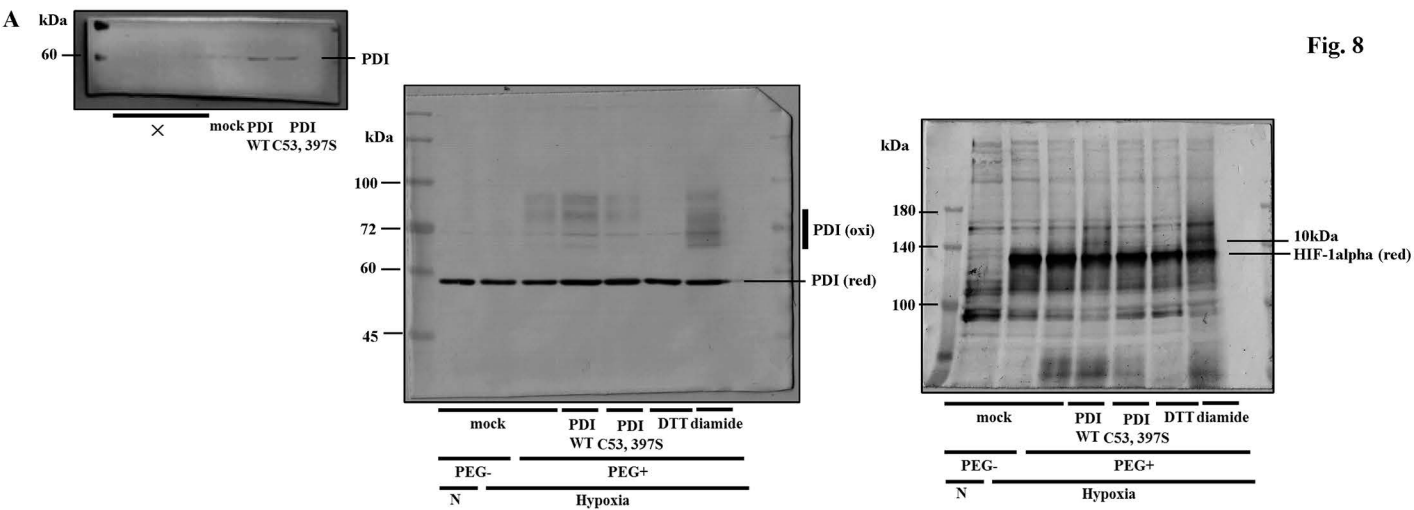

**B**

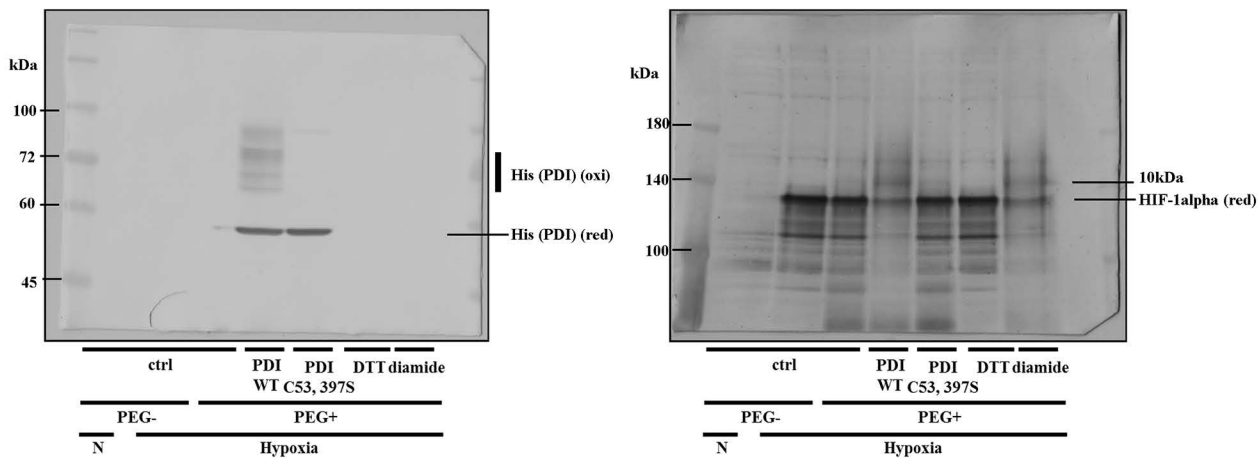

C

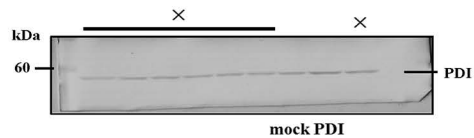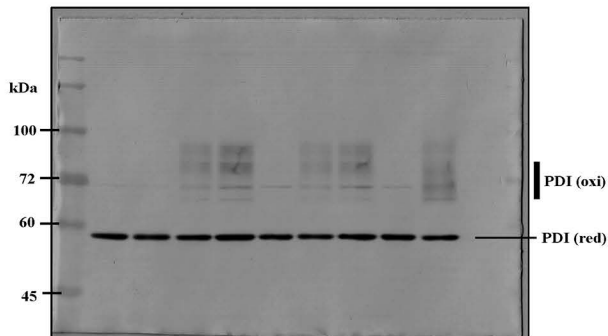

| mock    | PDI WT |      | mock    | PDI WT             | DTT diamide |
|---------|--------|------|---------|--------------------|-------------|
| PEG-    | PEG+   | PEG- | PEG+    | NH <sub>4</sub> Cl |             |
| Control |        |      | Hypoxia |                    |             |
| N       |        |      |         |                    |             |

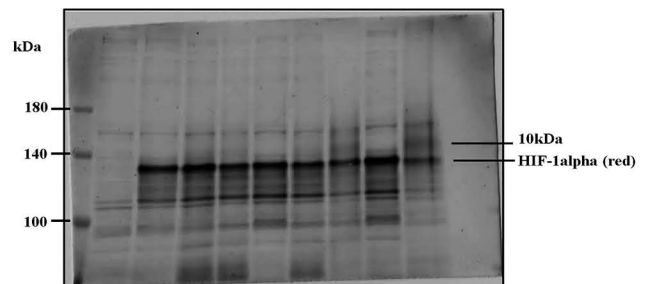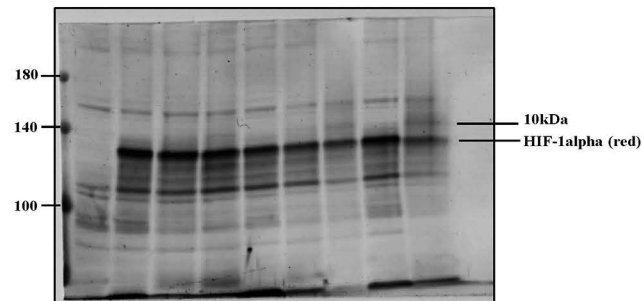

| mock    | PDI WT |      | mock    | PDI WT             | DTT diamide |
|---------|--------|------|---------|--------------------|-------------|
| PEG-    | PEG+   | PEG- | PEG+    | NH <sub>4</sub> Cl |             |
| Control |        |      | Hypoxia |                    |             |
| N       |        |      |         |                    |             |

D

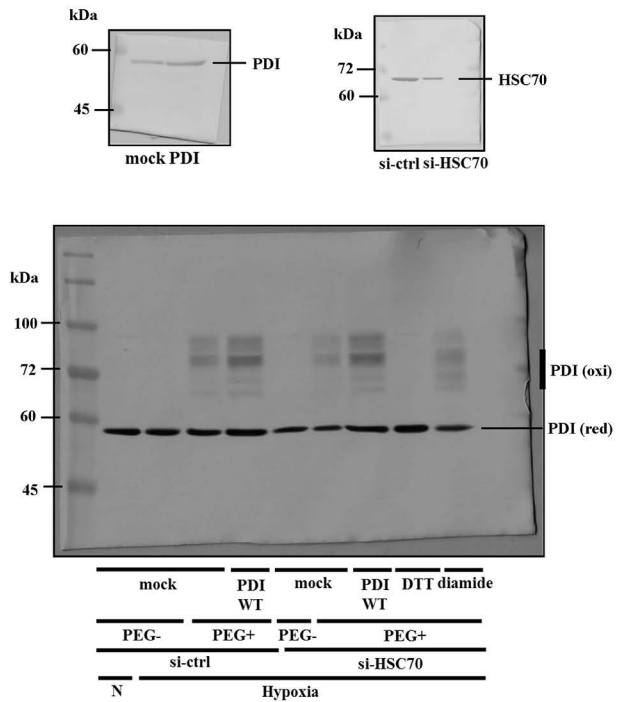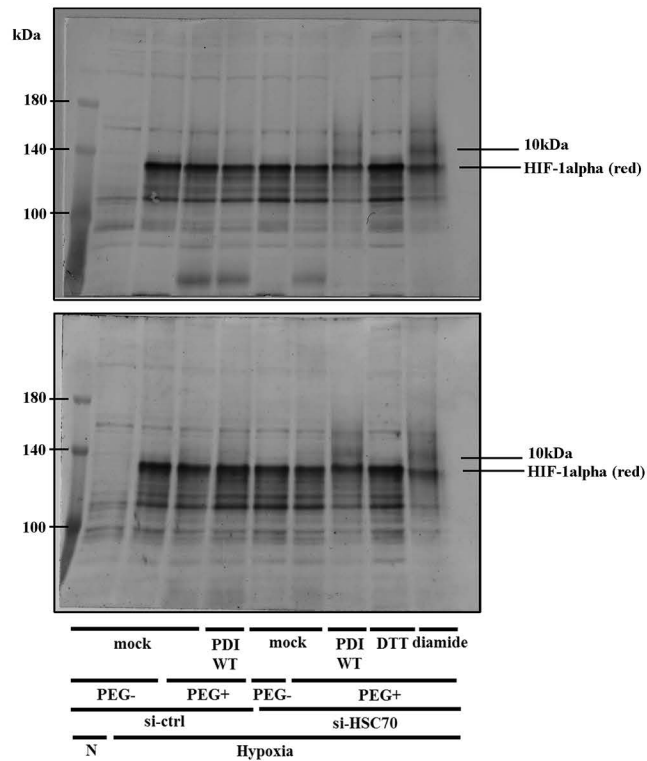

**A**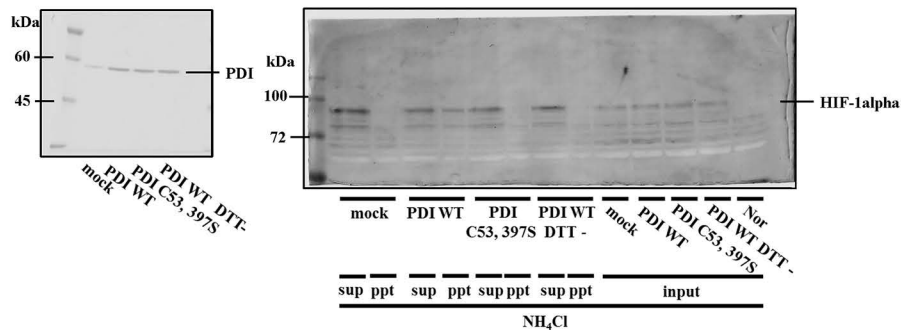**B**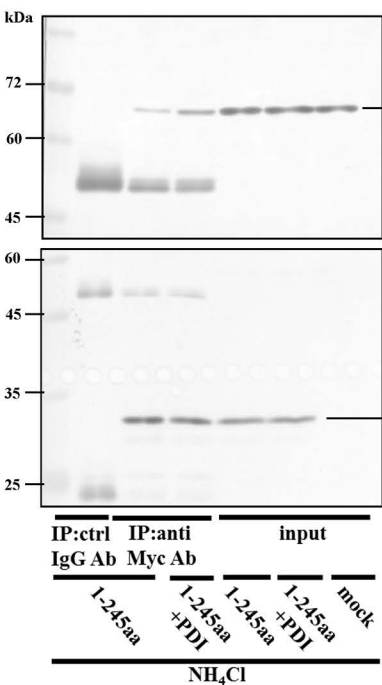**C**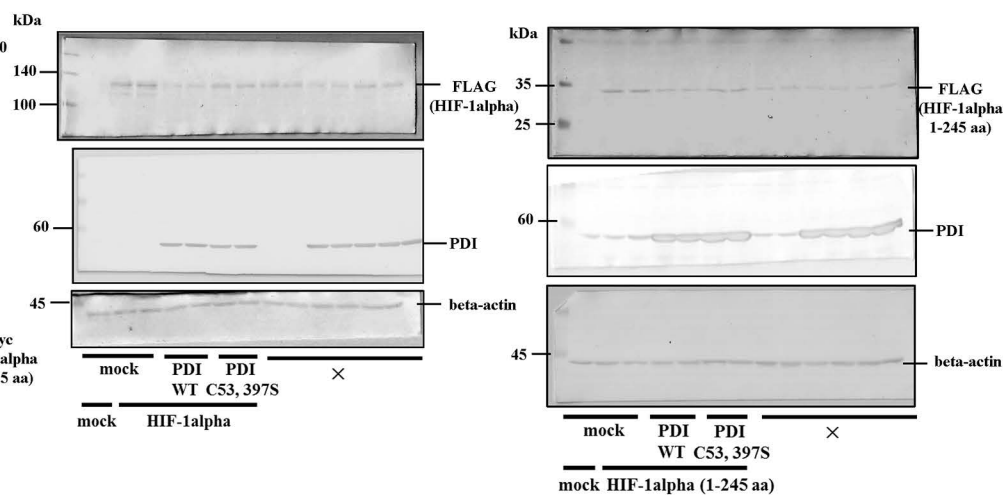

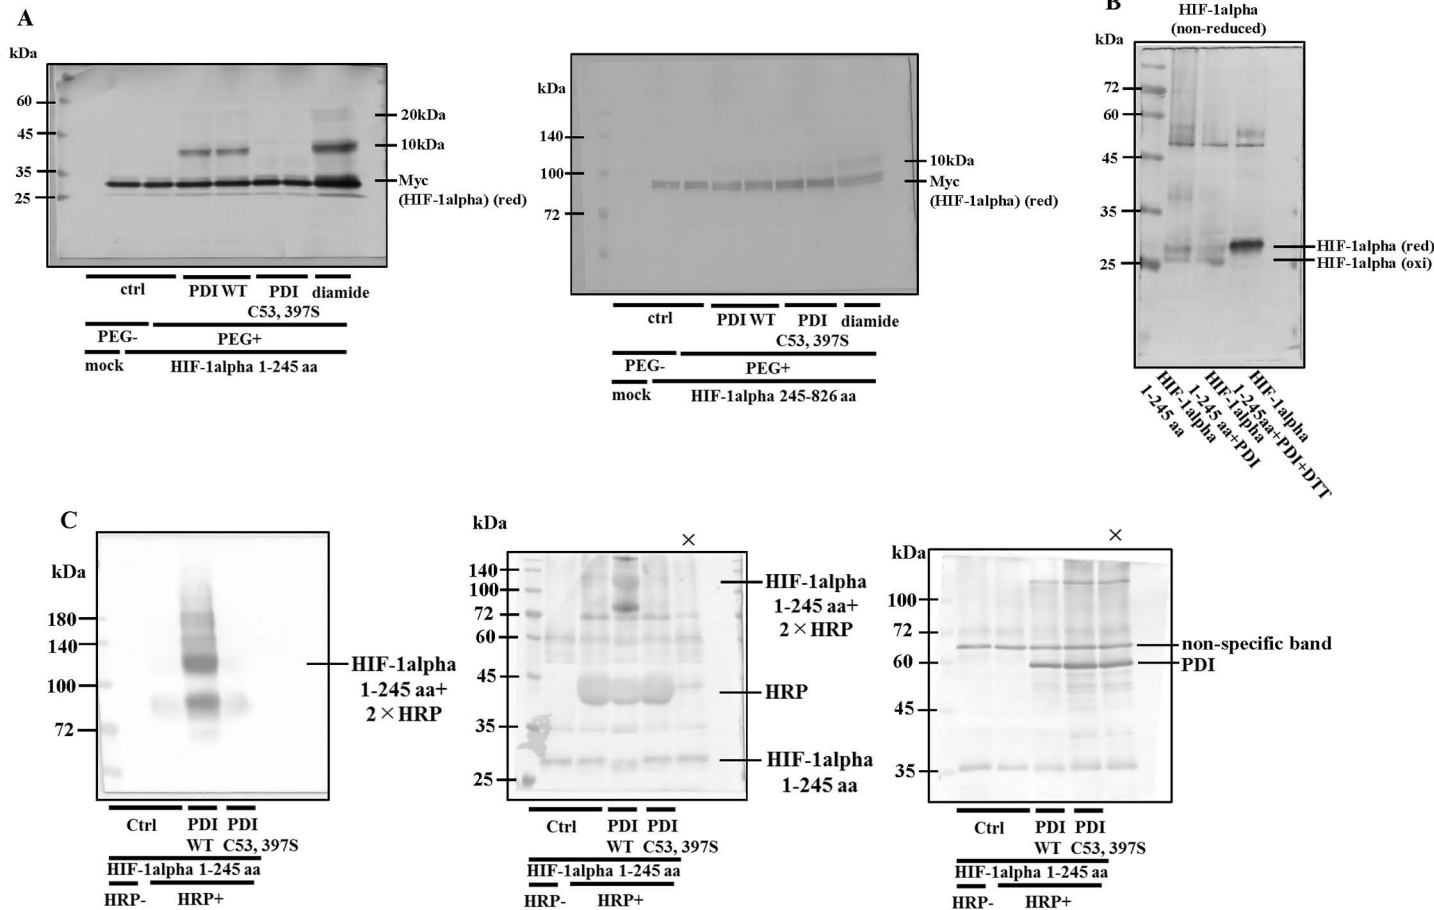

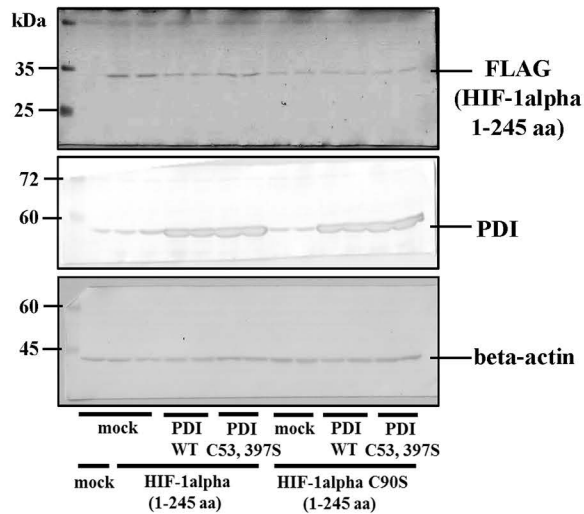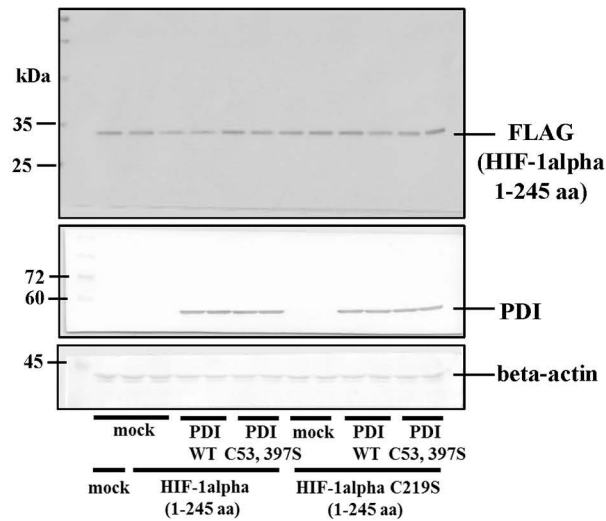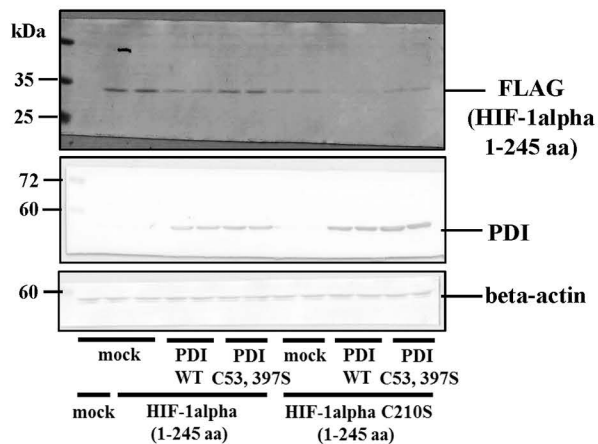

Supplement: pone.0246531.s001.pdf [file pone.0246531.s001.pdf]
